# Supplementary material for: Bioinspired Multi‐Stimuli Responsive Actuators with Synergistic Color‐ and Morphing‐Change Abilities
Source: PubMed Central journal article supplement (PMC8373155; doi:10.1002/advs.202101295), 2021-06-10
Supplement: ADVS-8-2101295-s006.pdf [file ADVS-8-2101295-s006.pdf]

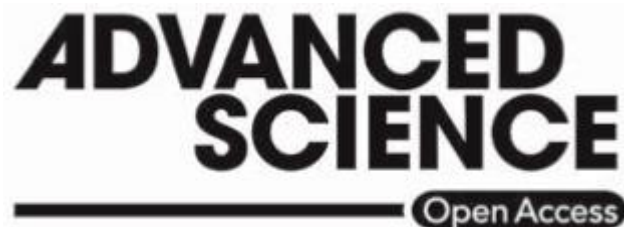

## Supporting Information

for *Adv. Sci.*, DOI: 10.1002/advs.202101295

Bioinspired Multi-Stimuli Responsive Actuators with  
Synergistic Color- and Morphing-Change Abilities

*Xinkai Li, Jize Liu, Dongdong Li, Shaoquan Huang, Kai  
Huang\* and Xinxing Zhang\**

---

## Supporting Information

### **Bioinspired Multi-Stimuli Responsive Actuators with Synergistic Color- and Morphing-Change Abilities**

*Xinkai Li, Jize Liu, Dongdong Li, Shaoquan Huang, Kai Huang\* and Xinxing Zhang\**

X. Li, J. Liu, Prof. X. Zhang

State Key Laboratory of Polymer Materials Engineering, Polymer Research Institute of Sichuan University, Chengdu 610065, China

E-mail: xxzwwh@scu.edu.cn

S. Huang, Dr. K. Huang

National Engineering Research Center for Non-Food Biorefinery, Guangxi Key Laboratory of Bio-refinery, Guangxi Academy of Sciences, 98 Daling Road, Nanning, 530007, China.

E-mail: hwkai@gxas.cn

D. Li

Guangxi Beitou Environmental Protection&Water Group Co., Ltd. 153 Minzu Avenue, Nanning, 530029, China.

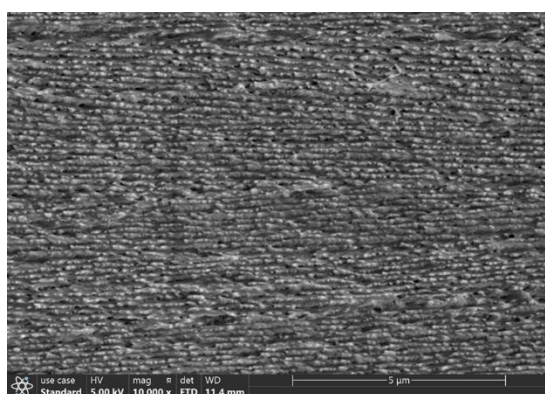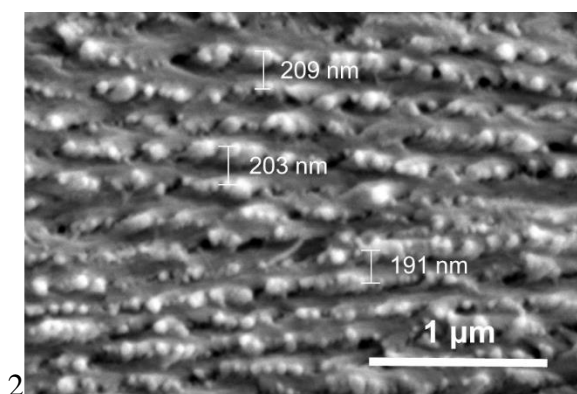

---

**Figure S1.** SEM cross-section images of the glucose-assisted assembled CNCs film. The value of  $p/2$  for the CNCs/glucose composite membrane is  $201 \pm 7$  nm.

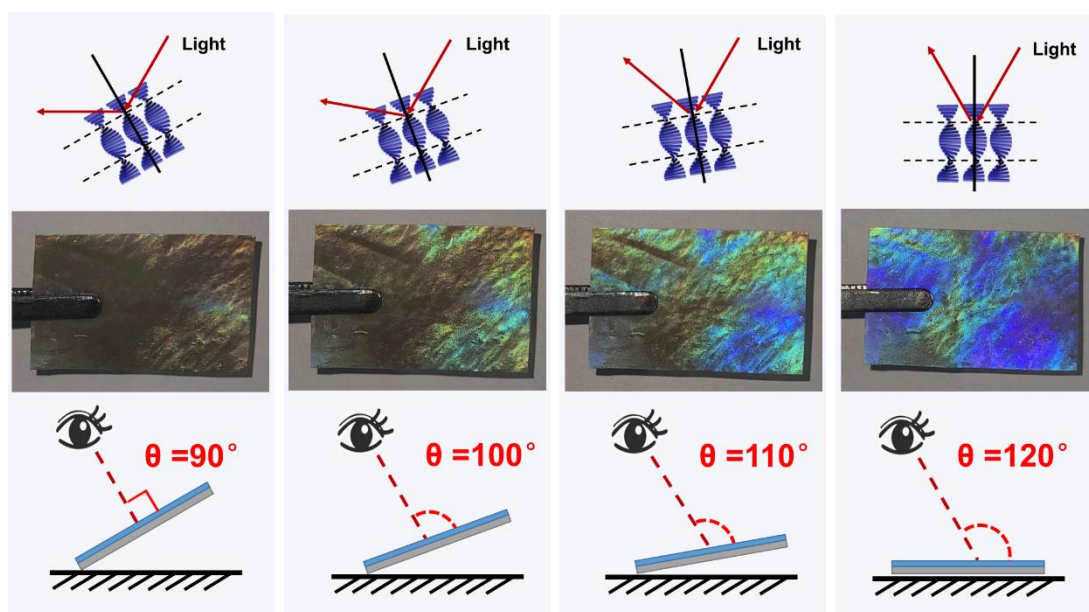

**Figure S2.** Digital pictures of the cholesteric LC film as the viewing angle increases from  $90^\circ$  to  $120^\circ$ .

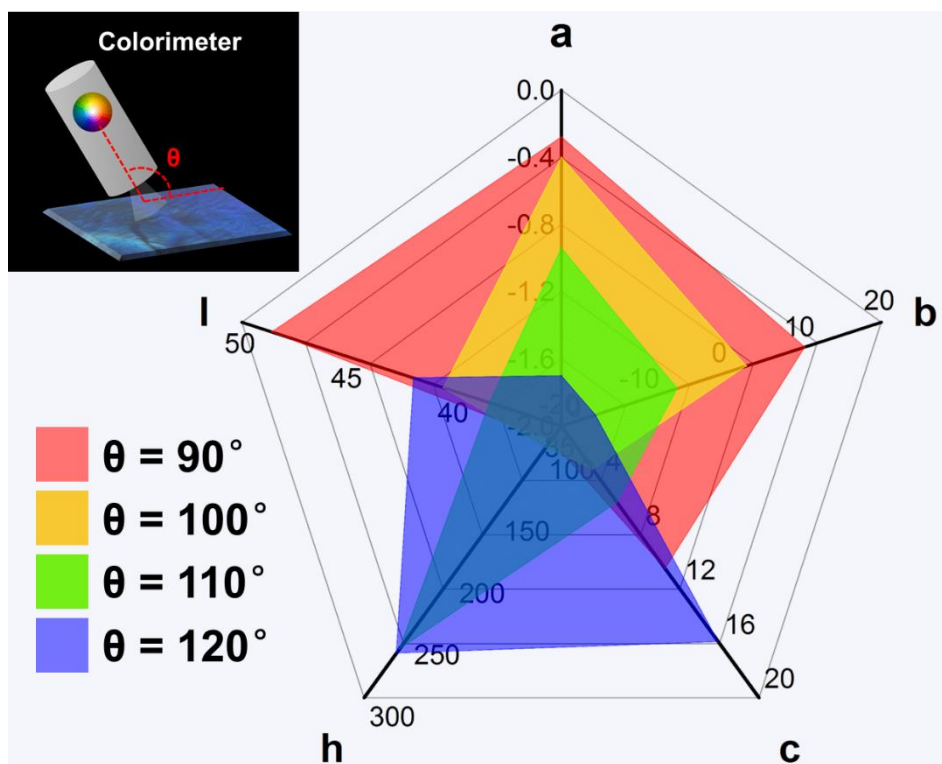

**Figure S3.** The alterable structure color of the cholesteric LC can be characterized by colorimeter at different view angles ( $90^\circ$ ,  $100^\circ$ ,  $110^\circ$ ,  $120^\circ$ ).

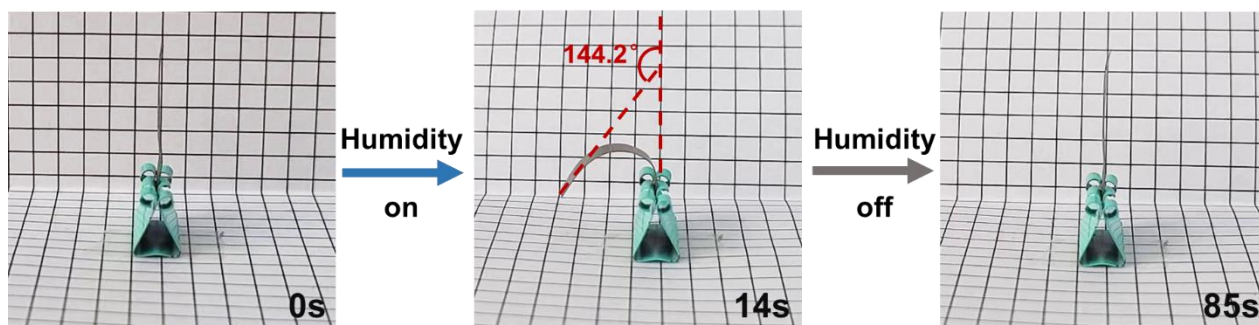

**Figure S4.** Digital pictures of an actuator reversibly bending in the vertical orientation when humidity is switched on and off. The vertical bending angle of the actuator increases from  $0^\circ$  to  $144.2^\circ$  as the moisture absorption time increases from 0 to 14 s, and then it takes 71 s to revert to its original position without humidifying.

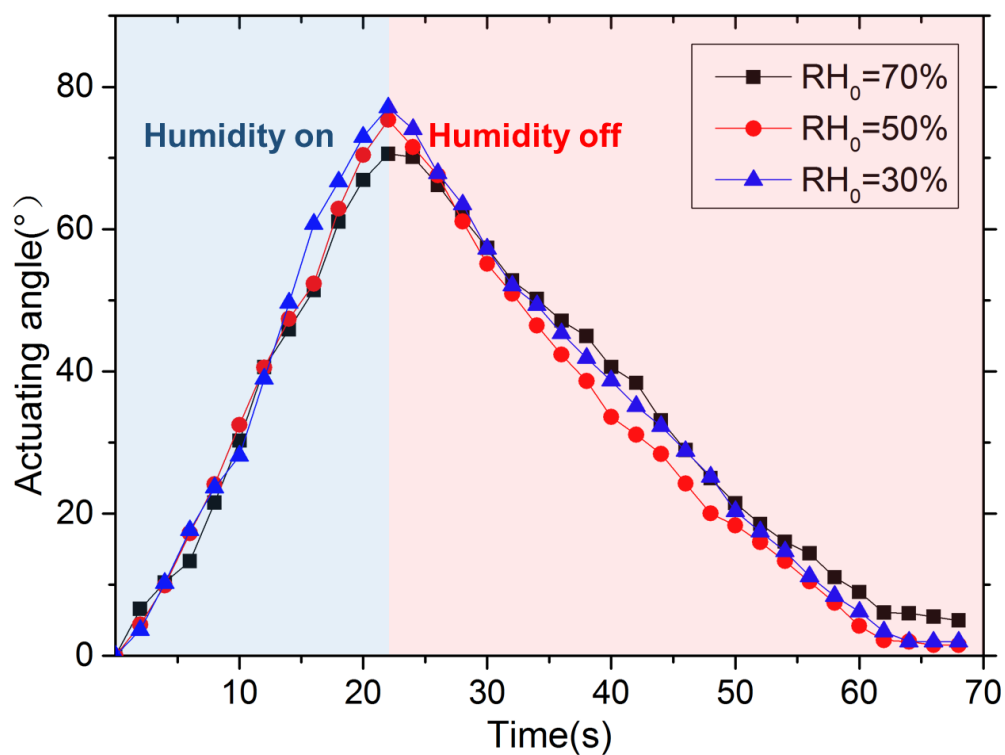

**Figure S5.** Humidity-actuating performance of the actuator under different original ambient relative humidity (RH) (70%, 50%, 30%). Temperature and the applied additional moisture remain constant.

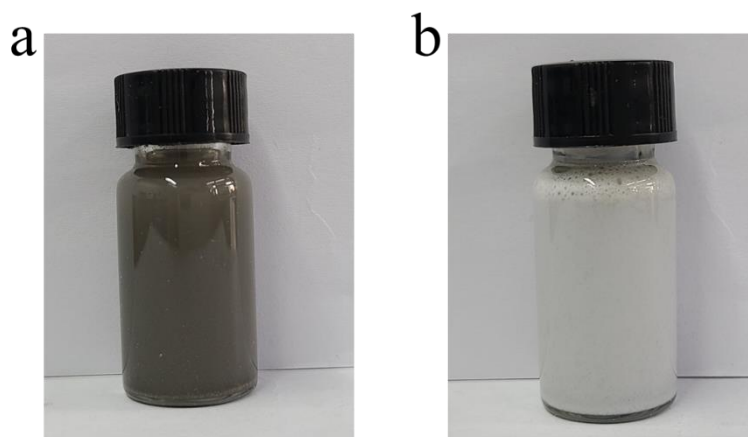

**Figure S6.** Digital pictures of a) AgNPs aqueous dispersion and b) PU/AgNPs mixture.

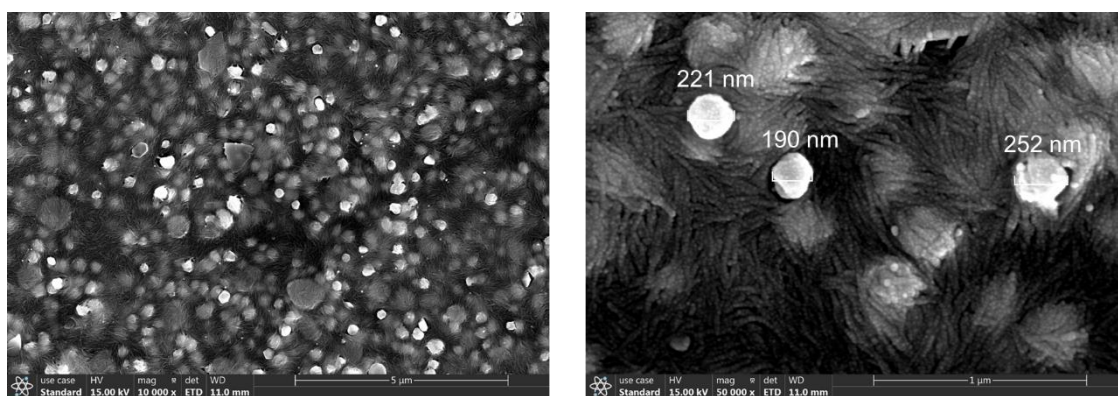

**Figure S7.** SEM images of the silver nanoparticles. The value of diameter for the AgNPs is  $221 \pm 25$  nm.



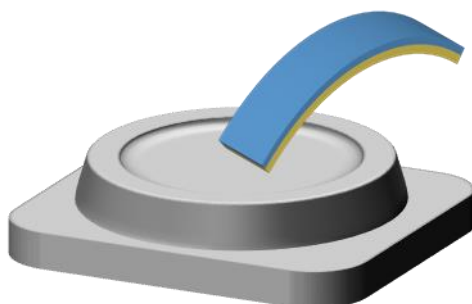

**Figure S8.** Schematic depiction of the experimental setup used for testing the actuation force of the actuating film.

To confirm photo-induced mechanical stress, we firstly utilize electromagnetic gauge transducer to measure the light-generated force of the actuator films by applying NIR light (808 nm) to a strip-shaped sample ( $20 \times 5 \times 0.153 \text{ mm}^3$ ) at room temperature. The mechanical force generated by the sample film can be monitored from the following formula:  $F = mg$ , where  $m$  is the real-time mass on indicator of the balance,  $g$  is the acceleration of gravity. Then, the mechanical forces are converted into stress followed by the following formula:  $P = F/S$ , where  $S$  is cross sectional area of the strip-shaped film.

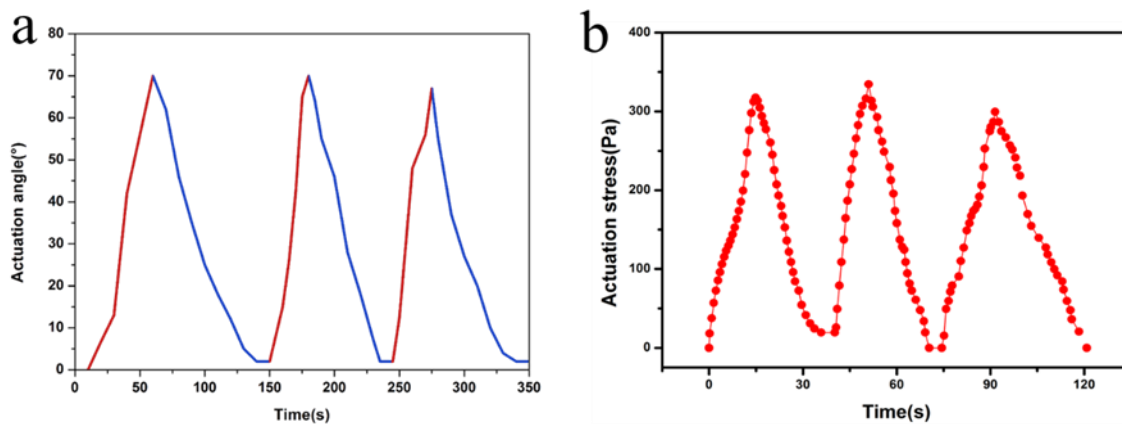

**Figure S9.** a) Humidity actuation angle and b) actuation stress as a function of time. The cycle of force up and down with humidity on and off, respectively, can be repeated for 3 times without damping.

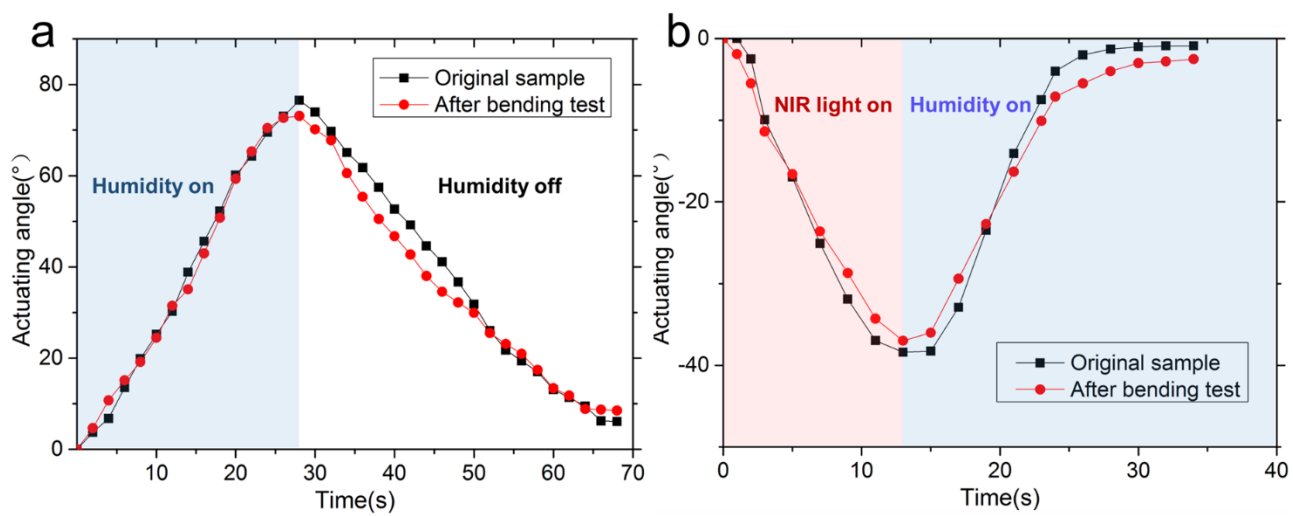

**Figure S10.** a) Humidity- and b) NIR-actuating performance of the actuator before and after subjected to 5,000 bending cycles.

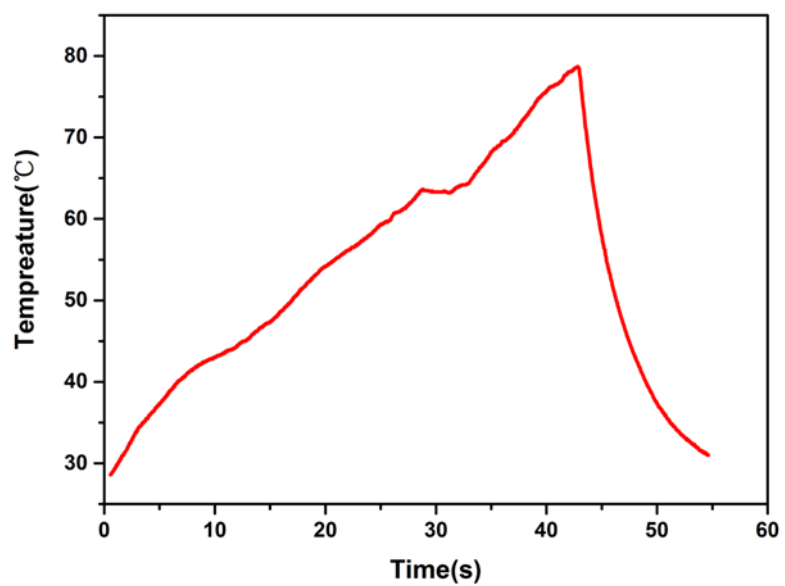

**Figure S11.** The temperature variation during the NIR-actuation process.

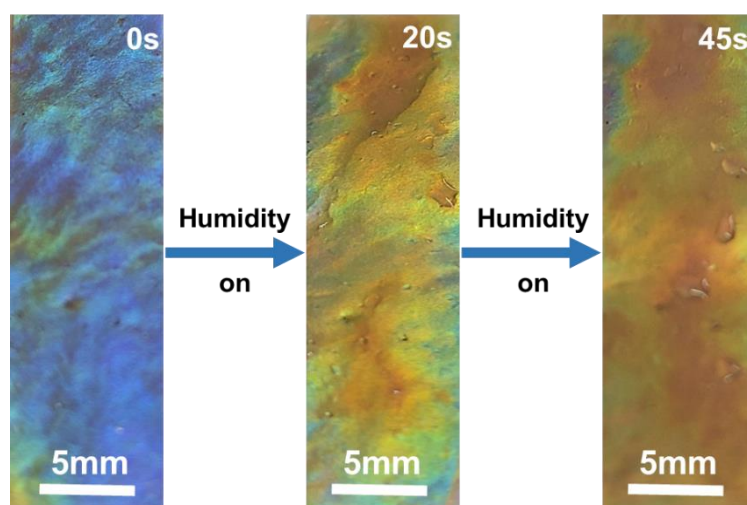

**Figure S12.** Digital images for structural color change of the CNCs/glucose composite under relative humidity 90%.

**Table S1.** Comparison of color changing performance of the recently reported materials.

| Ref. | Materials                                                                              | Conditions            | Time  | Colors                  | Other functions            |
|------|----------------------------------------------------------------------------------------|-----------------------|-------|-------------------------|----------------------------|
| [1]  | Eu <sup>3+</sup> -poly(N-isopropylacrylamide)<br>- potassium<br>6-acrylamidopicolinate | Tb <sup>3+</sup>      | 1800s | Red – Green             | Actuation                  |
| [2]  | zinc-ion-intercalated<br>layered polydiacetylene- cellulose<br>paper (T-paper)         | 40 °C to<br>140 °C    | 20 s  | Blue – Purple           | Actuation                  |
| [2]  | PI tape-T-paper-MXene/<br>graphene                                                     | 40 °C to<br>140 °C    | 20 s  | Green –<br>Orange       | Actuation,<br>Self-sensing |
| [3]  | Sr <sub>2</sub> P <sub>2</sub> O <sub>7</sub> :Eu,Y                                    | Strain:<br>20 %-100 % | /     | Blue – Purple           | /                          |
| [4]  | Au nanoparticles-<br>poly(N-isopropylacrylamide)                                       | 24 °C to 50 °C        | /     | Red - Grayish<br>violet | /                          |

---

|           |                                                                       |                 |                    |                            |                        |
|-----------|-----------------------------------------------------------------------|-----------------|--------------------|----------------------------|------------------------|
| [5]       | single-wall carbon nanotube-line elastomer                            | NIR irradiation | 15 s               | Cyan – Blue                | Actuation              |
| [6]       | liquid crystalline networks-PA                                        | Humidity        | 6 s                | Dark green – Green         | Actuation              |
| [7]       | P(AAm-co-AAc) - poly(N-isopropylacrylamide)                           | NIR irradiation | 80 s<br>30 - 240 s | Green – Red<br>Green – Red | Actuation<br>Actuation |
| [8]       | Fe <sub>3</sub> O <sub>4</sub> @PVP-CNCs- poly(N-isopropylacrylamide) | 10 °C to 35 °C  | /                  | Green – Yellow – Red       | /                      |
| This work | CNCs@glucose-PU/AgNPs                                                 | Humidity        | 9 s                | Blue – Green – Brown       | Actuation              |
|           |                                                                       | NIR irradiation | 16 s               | Brown – Green – Blue       | Actuation              |

---

## Reference

- [1] S. Wei, W. Lu, X. Le, C. Ma, H. Lin, B. Wu, J. Zhang, P. Theato, T. Chen, *Angew. Chemie Int. Ed.* **2019**, *58*, 16243.
- [2] H. Zhao, R. Hu, P. Li, A. Gao, X. Sun, X. Zhang, X. Qi, Q. Fan, Y. Liu, X. Liu, M. Tian, G. Tao, L. Qu, *Nano Energy* **2020**, *76*, 104926.
- [3] B. Tian, Z. Wang, A. T. Smith, Y. Bai, J. Li, N. Zhang, Z. Xue, L. Sun, *Nano Energy* **2021**, *83*, 105860.
- [4] A. Choe, J. Yeom, R. Shanker, M. P. Kim, S. Kang, H. Ko, *NPG Asia Mater.* **2018**, *10*, 912.
- [5] S. Banisadr, J. Chen, *Sci. Rep.* **2017**, *7*, 17521.
- [6] R. Lan, Y. Gao, C. Shen, R. Huang, J. Bao, Z. Zhang, Q. Wang, L. Zhang, H. Yang, *Adv. Funct. Mater.* **2021**, 2010578.
- [7] Z. Zhang, Z. Chen, Y. Wang, J. Chi, Y. Wang, Y. Zhao, *Small Methods* **2019**, *3*, 1900519.
- [8] H. Ma, M. Zhu, W. Luo, W. Li, K. Fang, F. Mou, J. Guan, *J. Mater. Chem. C* **2015**, *3*, 2848.
